# Supplementary material for: Effect of Porcine Whole Blood Protein Hydrolysate on Slow-Twitch Muscle Fiber Expression and Mitochondrial Biogenesis via the AMPK/SIRT1 Pathway
Source: MDPI journal article supplement (doi:10.3390/ijms23031229), 2022-01-22
Supplement: s1 [file s1]

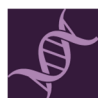

Supplementary Material

**Table S1.** Physiological amino acid compositions of PWBPH.

|                          | List of Amino Acids | Contents (mg/100g) |
|--------------------------|---------------------|--------------------|
| Physiological Amino Acid | Threonine           | 1197.01            |
|                          | Cysteine            | 70.79              |
|                          | Tyrosine            | 1111.59            |
|                          | Arginine            | -                  |
|                          | Alanine             | 2056.28            |
|                          | Proline             | 165.18             |
|                          | Lysine              | 1464.38            |
|                          | Histidine           | 984.23             |
|                          | Isoleucine          | 611.30             |
|                          | Leucine             | 6016.50            |
|                          | Methionine          | 401.51             |
|                          | Phenylalanine       | 2147.77            |
|                          | Tryptophan          | 76.33              |
|                          | Valine              | 1738.06            |
|                          | Glutamic Acid       | 1850.13            |
|                          | Aspartic Acid       | 1520.94            |
|                          | Serine              | 1226.45            |
|                          | Glycine             | 340.33             |
